# Supplementary material for: Inflammation status modulates the effect of host genetic variation on intestinal gene expression in inflammatory bowel disease
Source: PubMed Central journal article supplement (PMC7892863; doi:10.1038/s41467-021-21458-z), 2021-02-18

1 **Supplementary Information**

2

3 **Inflammation status modulates the effect of host genetic variation on intestinal gene**  
4 **expression in inflammatory bowel disease**

5

6

7 **Supplementary figure1. Cell type-enrichment differs between inflamed and non-inflamed**

8 **tissues.** X axis indicates cell type-enrichment scores derived from xCell. Y axis indicates 28 cell

9 types present in intestinal mucosa. \*significant difference (two-sided Wilcoxon test, FDR

10 <0.05) Box plots show medians and the first and third quartiles (the 25<sup>th</sup> and 75<sup>th</sup> percentiles),

11 respectively. The upper and lower whiskers extend the largest and smallest value no further

12 than 1.5\*IQR (n =280 samples, source data are provided as a Source Data file).

13

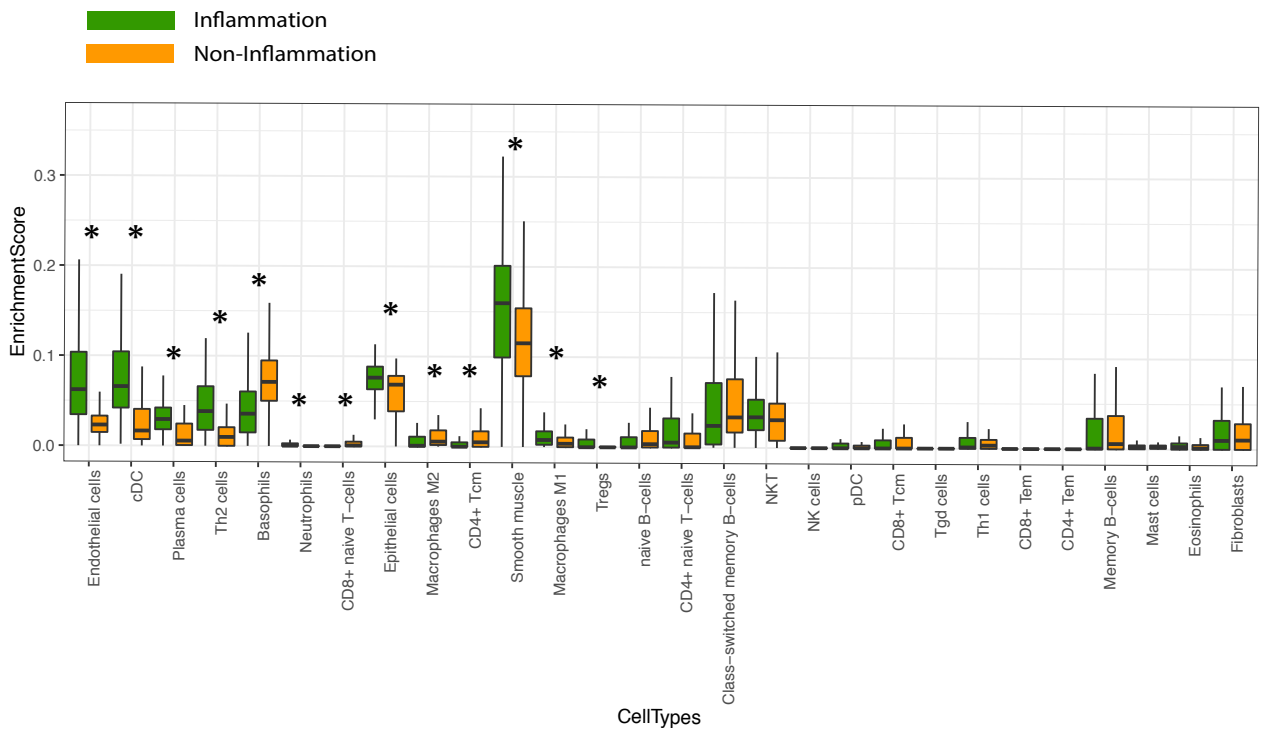

14

15

16 **Supplementary Figure 2. Replication of *cis*-eQTLs in GTEx, 'CEDAR' and the eQTLGen study.**  
17 A) Replication rate (99.15 %) between *cis*-eQTLs identified in this study and terminal ileum *cis*-  
18 eQTLs in GTEx. B) Replication rate (97.48%) between *cis*-eQTLs identified in this study and  
19 sigmoid *cis*-eQTLs in GTEx. C) Replication rate (99.27%) between *cis*-eQTLs identified in this  
20 study and transverse colon *cis*-eQTLs in GTEx. D) Replication rate (92.86%) between *cis*-eQTLs  
21 identified in this study and ileum *cis*-eQTLs in the 'CEDAR' study. E) Replication rate (92.25%)  
22 between *cis*-eQTLs identified in this study and transverse *cis*-eQTLs in the 'CEDAR' study. F)  
23 Replication rate (94.64%) between *cis*-eQTLs identified in this study and rectum *cis*-eQTLs in  
24 the 'CEDAR' study G) Replication rate (81.44%) between *cis*-eQTLs identified in this study and  
25 blood *cis*-eQTLs in the eQTLGen study (Source data are provided as a Source Data file).

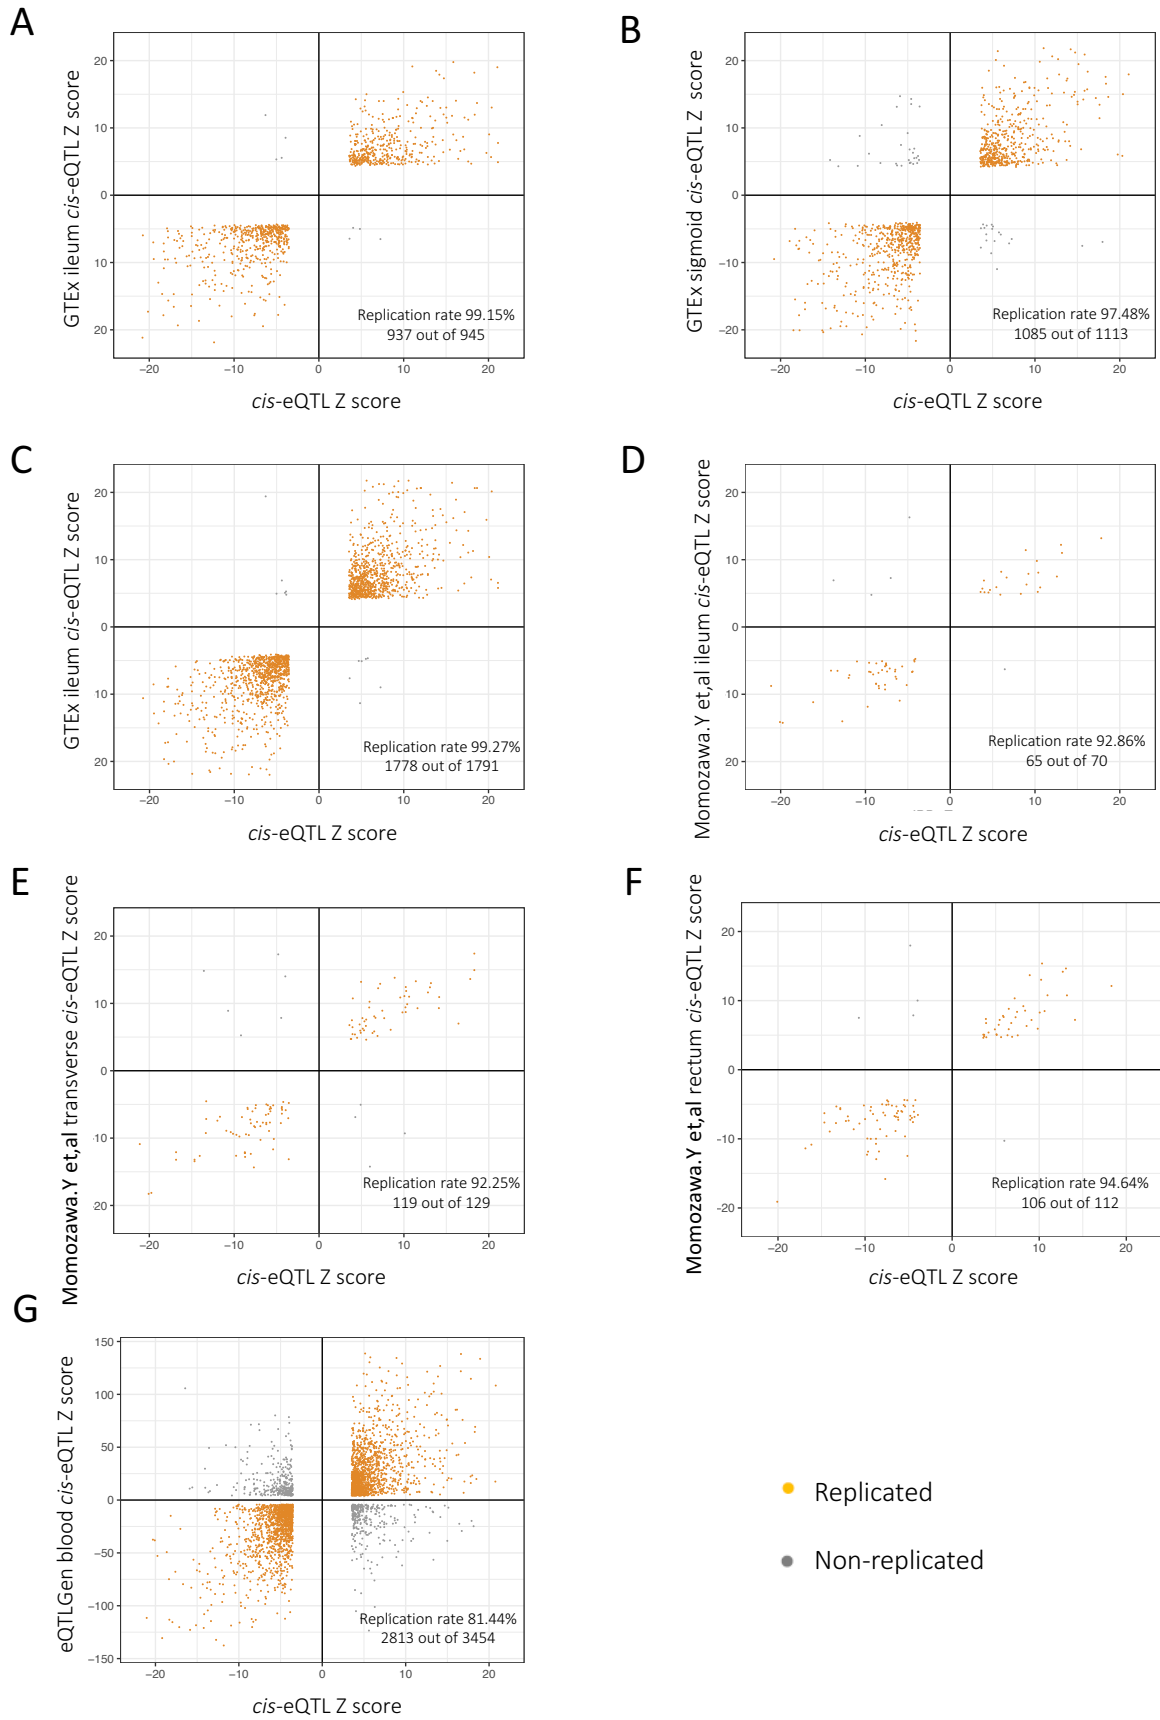

27 **Supplementary Figure 3. Three potentially IBD-dependent cis-eQTLs.** A) *cis*-eQTL effect  
 28 between SNP rs4342945 and gene *PPP2R2D* (T/C, linear regression, *t*-test, beta =-0.14, FDR  
 29 =0.00059), B) *cis*-eQTL effect between SNP rs10748 and gene *RBL2* (T/C, linear regression, *t*-  
 30 test, beta =0.19, FDR =7.29e-07), C) *cis*-eQTL effect between SNP rs2742414 and gene *LIMD1*  
 31 (T/C, linear regression, *t*-test, beta =-0.14, FDR =0.04). The left panels are *cis*-eQTLs derived  
 32 from this study while the right panels are derived from GTEx (v8)  
 33 (<https://gtexportal.org/home/>). X axis indicates the genotype of eSNP and Y axis indicates the  
 34 scaled expression level of eGenes. *Cis*-eQTL effect between rs8768 and gene *ZNF593* was not  
 35 found in GTEx v8. Box plots show medians and the first and third quartiles (the 25th and 75th  
 36 percentiles), respectively. The upper and lower whiskers extend the largest and smallest value  
 37 no further than 1.5\*IQR (n =280 samples, source data are provided as a Source Data file).  
 38

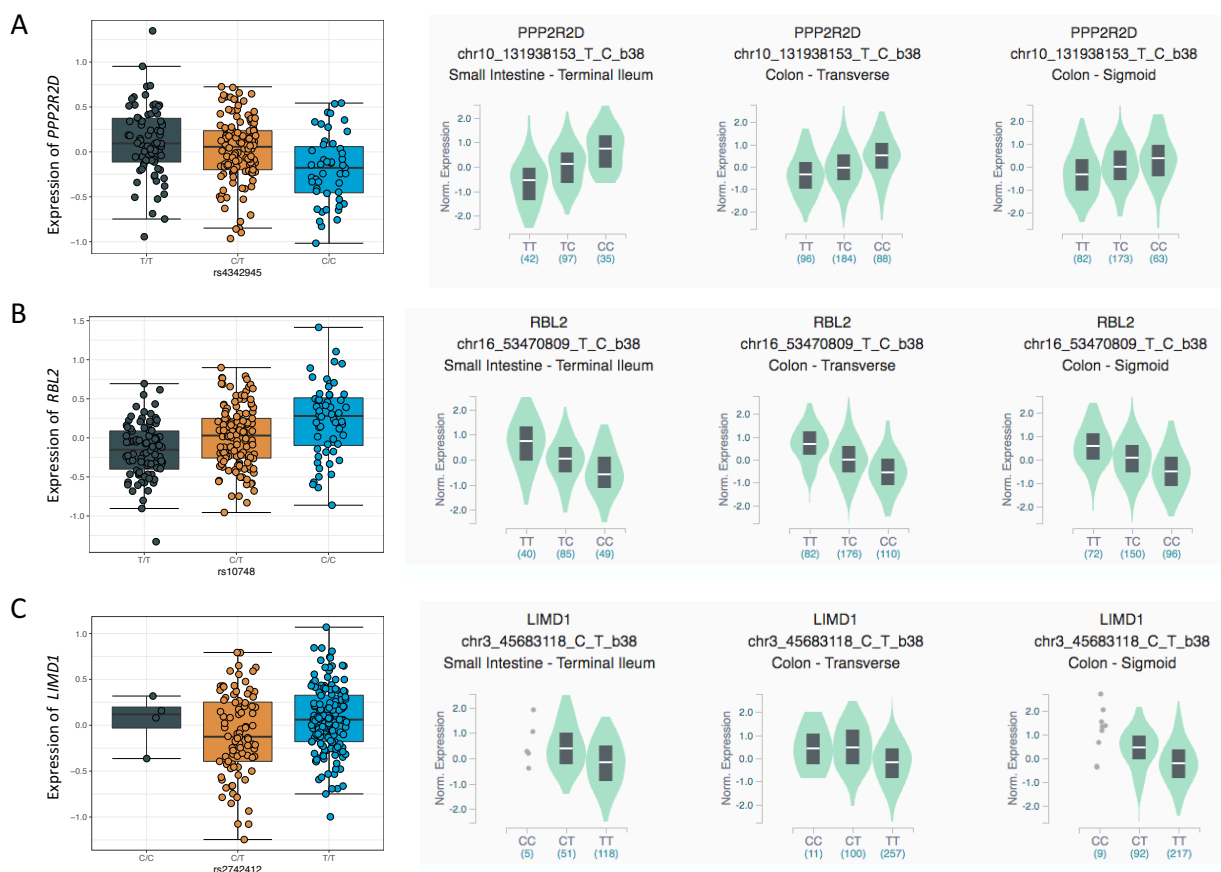

39  
 40

41 **Supplementary Figure 4. Permutation test for inflammation-dependent *cis*-eQTLs.** 10x  
42 permutations were done for inflammation-dependent *cis*-eQTL analysis. On average, 49  
43 random significant (linear regression, *t*-test,  $FDR_{interaction} < 0.05$ , red line) *cis*-eQTLs were  
44 identified using permutations. In the actual non-permutation analysis, 1,854 significant (linear  
45 regression, *t*-test,  $FDR_{interaction} < 0.05$ ) *cis*-eQTLs were identified, which suggests an FDR of  
46 ~2.67% (Source data are provided as a Source Data file).

47

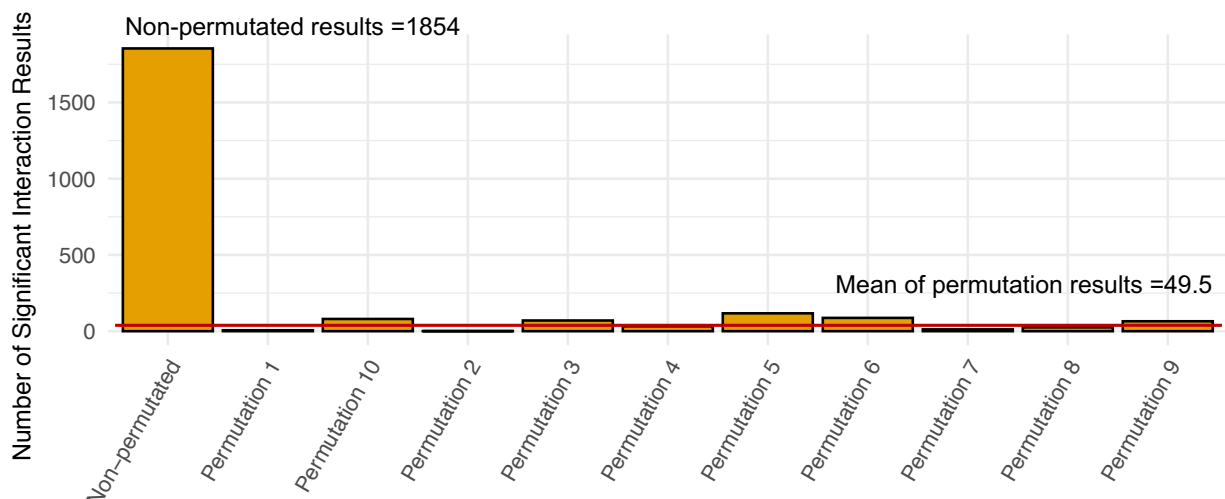

48

49

50 **Supplementary Figure 5. Gene expression variation explained by principal components**  
51 **(PCs).** X axis indicates the number of PCs. Y axis indicates the total explained variance. Red line  
52 indicates the first 18 PCs, which together correspond to 77% of the explained variance (Source  
53 data are provided as a Source Data file).

54

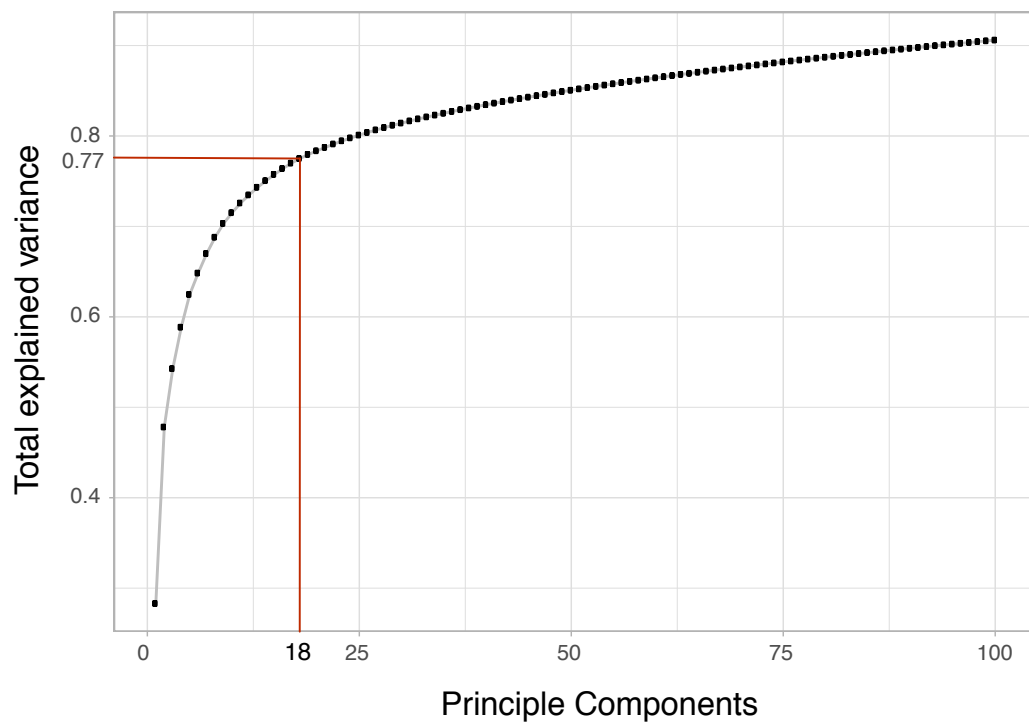

55

56

57 **Supplementary Figure 6. PCs and known factors contributing to the variation in gene**  
58 **expression.** A) The first two PCs explain ~48% of gene expression variation. Each dot indicates  
59 one biopsy sample. The first PC is relevant to biopsy location and disease subphenotype (right  
60 and left panel). The second PC is relevant to inflammation status (middle panel). B)  
61 Associations between the first PCs and known factors. Barplot, gene expression variance  
62 explained by each of first 18 PCs. Heatmap, each square indicates the correlation ( $R^2$ ,  
63 Spearman correlation) between the PC and known factors that could potentially cause  
64 differential gene expression (Source data are provided as a Source Data file).  
65

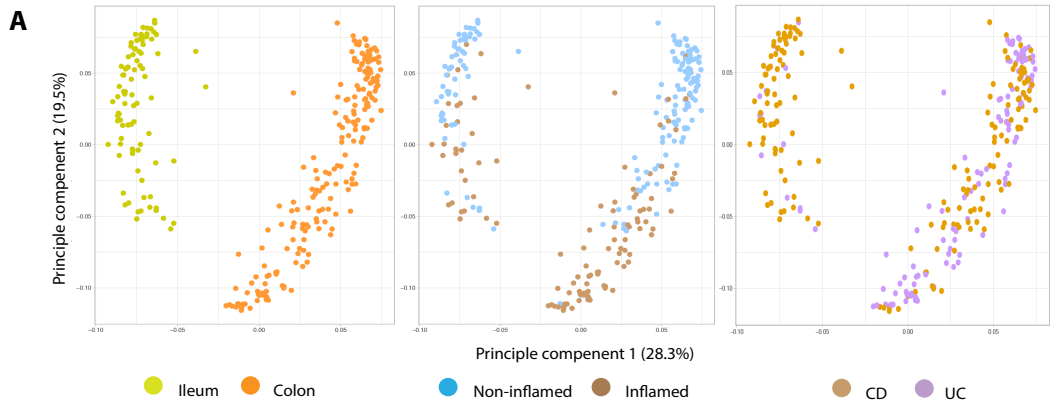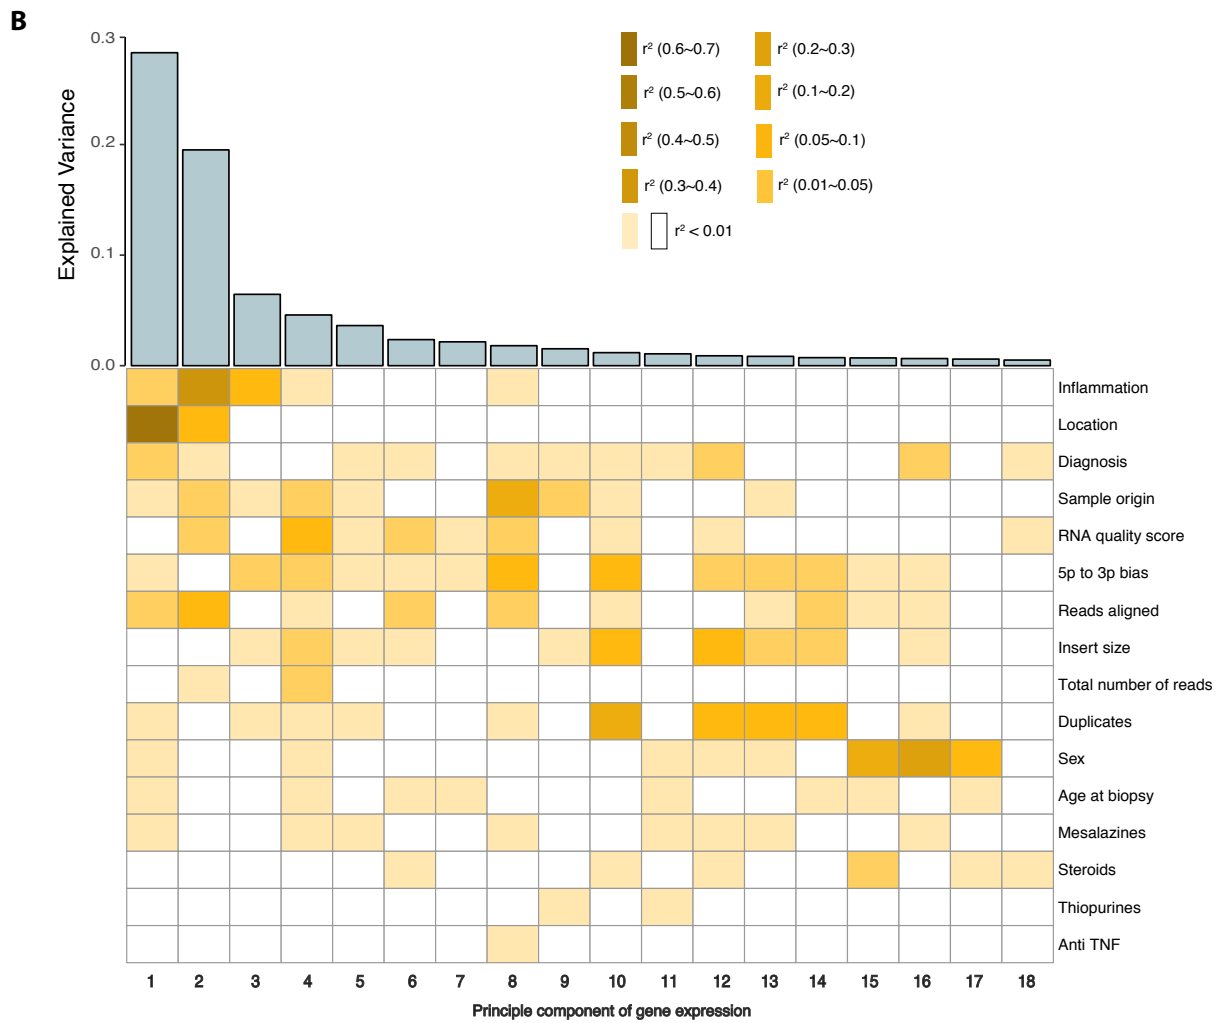

Supplement: 41467_2021_21458_MOESM1_ESM.pdf [file 41467_2021_21458_MOESM1_ESM.pdf]
